# Supplementary material for: Corrosion inhibition of mild steel using eco-friendly porous nanocarbon derived from waste mango kernels: a step towards sustainability
Source: Royal Society of Chemistry journal article supplement (doi:10.1039/d5ra09725h), 2026-01-01
Supplement: d5ra09725h1.pdf [file d5ra09725h1.pdf]

## Corrosion Inhibition of Mild Steel Using Eco-Friendly Porous Nanocarbon Derived from Waste Mango Kernels: A Step Towards Sustainability

Anvitha Murari<sup>a</sup>, Arathi A<sup>b</sup>, Uraiwan Sirimahachai<sup>c</sup>, Srilatha Rao<sup>b</sup>, Gurumurthy Hegde<sup>a\*</sup>

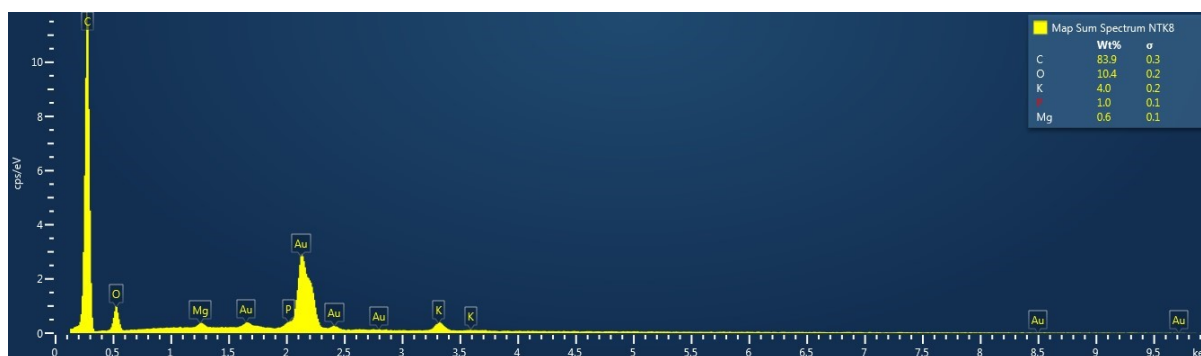

Fig. S1 EDS of MK800.

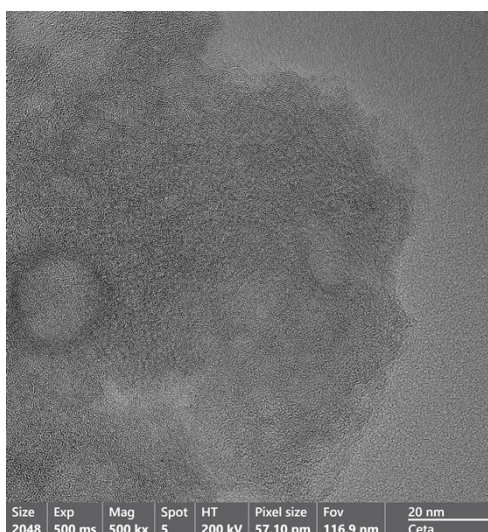

Fig. S2 TEM image of MK800.

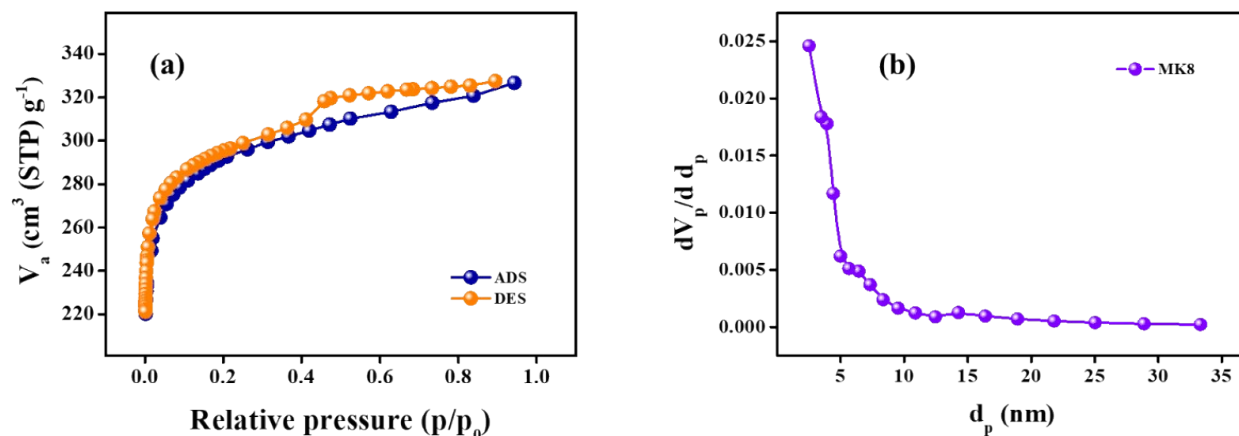

**Fig. S3 (a) BET adsorption–desorption isotherm and (b) pore-size distribution of MK800.**

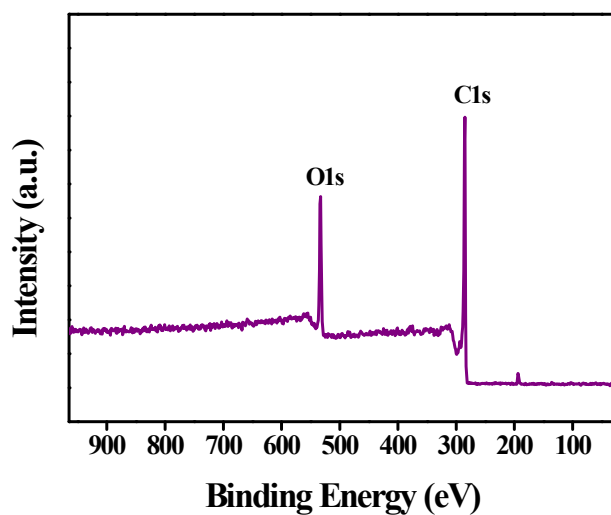

**Fig. S4 XPS survey spectra of MK800.**

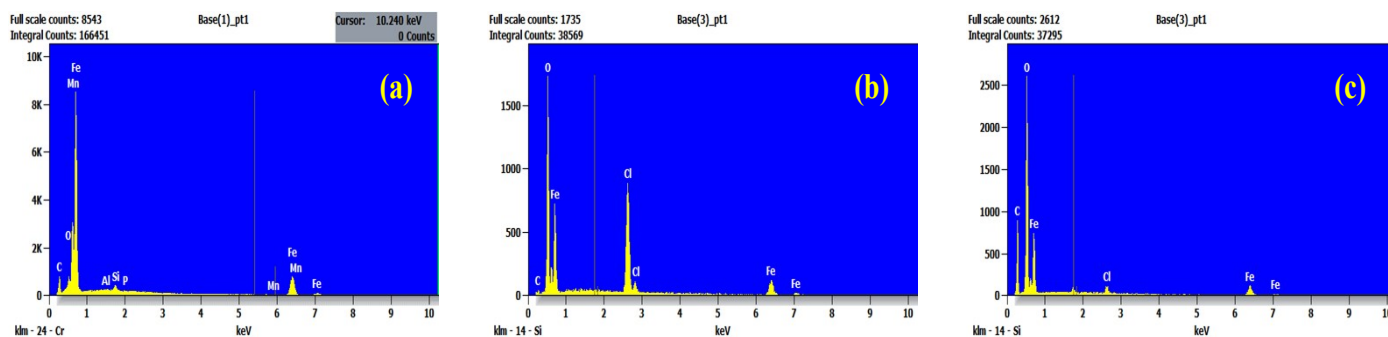

**Fig. S5 EDS of (a) polished, (b) uninhibited, and (c) inhibited MS samples at 298 K.**
